# Supplementary material
Source: MDPI journal article supplement (https://www.mdpi.com/2073-4344/9/11/919)
Supplement: s1 [file s1]

1 *Communication*

## 2 **Propene Adsorption-Chemisorption Behaviors on H-** 3 **SAPO-34 Zeolite Catalysts at Different Temperatures**

4 **Muhammad Usman** <sup>1,\*</sup>, **Jiang Zhu** <sup>2</sup>, **Kong Chuiyang** <sup>2</sup>, **Muhammad Tahir Arslan** <sup>2</sup>, **Abuzar Khan** <sup>1</sup>,  
 5 **Ahmad Galadima** <sup>1,3</sup>, **Oki Muraza** <sup>1</sup>, **Ibrahim Khan** <sup>4</sup>, **Aasif Helal** <sup>1</sup>, **Bassem A. Al-Maythaly** <sup>5</sup>  
 6 **and Zain H. Yamani** <sup>1</sup>

7 <sup>1</sup> Center of Excellence in Nanotechnology, King Fahd University of Petroleum and Minerals, KFUPM,  
 8 Dhahran 31261, Saudi Arabia; abuzar@kfupm.edu.sa (A.K.); ahmadgldm@yahoo.com (A.G.);  
 9 omuraza@kfupm.edu.sa (O.M.); aasifh@kfupm.edu.sa (A.H.); zhyamani@kfupm.edu.sa (Z.H.Y.)

10 <sup>2</sup> Department of Chemical Engineering, Tsinghua University Beijing 100084, China; zhu13062969@163.com  
 11 (J.Z.); kongchuiyan123@163.com (K.C.); imdadusmi\_ics@yahoo.com (M.T.A.)

12 <sup>3</sup> Federal University Gusau, Nigeria. ahmadgldm@yahoo.com (A.G.)

13 <sup>4</sup> Center of Integrative Petroleum Research, King Fahd University of Petroleum and Minerals, KFUPM Box  
 14 5040, Dhahran 31261, Saudi Arabia; ibrahim.zarin@kfupm.edu.sa (I.K.)

15 <sup>5</sup> King Abdulaziz City for Science and Technology – Technology Innovation Center on Carbon Capture and  
 16 Sequestration (KACST-TIC on CCS) at King Fahd University of Petroleum and Minerals, Dhahran 31261,  
 17 Saudi Arabia; (B.M) bmayth@kfupm.edu.sa

18 \* Correspondence: muhammadu@kfupm.edu.sa; Tel.: +966-138608539; Fax: +966-138607264

19

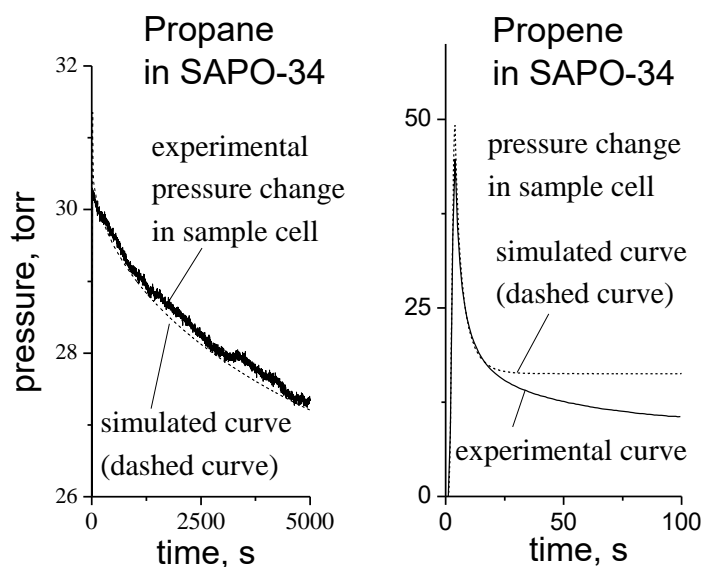

20

21 **Figure S1.** Experimental and simulated uptake curves for propane and propene in SAPO-34. (Source,  
 22 F. Wang, Y. Kobayashi, U. Muhammad, D. Wang, Y. Wang, *Review of Scientific Instruments* 2016, 87,  
 23 036101).

### 24 **Calculation of the adsorb gases**

25 The amount of gas adsorbed on sample is calculated by subtracting the amount of gas occupying  
 26 by the dead volume from that of gas dosed.

$$\Delta n_{\text{ads}} = \Delta n_{\text{int}} - \Delta n_{\text{c}}$$

$$= \frac{\Delta P_s \times V_s}{R \times T_s} - \frac{\Delta P_c \times V_c}{R \times T_c}$$

27

28

29

30

31

32

33

where  $\Delta n_{\text{ads}}$  is the amount of gas adsorbed on sample,  $\Delta n_{\text{int}}$  is the amount of gas dosed from the supply chamber,  $\Delta n_{\text{c}}$  is the amount of gas occupying the dead volume in the cell assembly,  $\Delta P_s$  is a pressure change in the supply chamber after the gas introduction,  $V_s$  is the volume of the supply chamber,  $T_s$  is temperature in the supply chamber,  $R$  is the gas constant,  $P_c$  is the pressure in the assembly after the gas introduction and when equilibrium reached (i.e., no further adsorption),  $V_c$  is the dead volume of the assembly with sample,  $T_c$  is temperature in the assembly.

34

#### Calculation of the dead volume

$$V_c = \frac{\Delta P_s \times T_c}{P_c \times T_s} V_s$$

35

36

37

38

39

where  $\Delta P_s$  is a pressure change in the supply chamber after the gas introduction,  $V_s$  is the volume of the supply chamber (648.48 m<sup>3</sup>),  $T_s$  is temperature in the supply chamber,  $R$  is the gas constant,  $P_c$  is the pressure in the assembly after the gas introduction,  $V_c$  is the dead volume of the assembly with sample,  $T_c$  is temperature in the assembly (room temperature).
